# Supplementary material for: Transcriptional Profiling of the Effect of Coleus amboinicus L. Essential Oil against Salmonella Typhimurium Biofilm Formation
Source: MDPI journal article supplement (doi:10.3390/antibiotics12111598), 2023-11-07

Figure S1

MS Spectrum

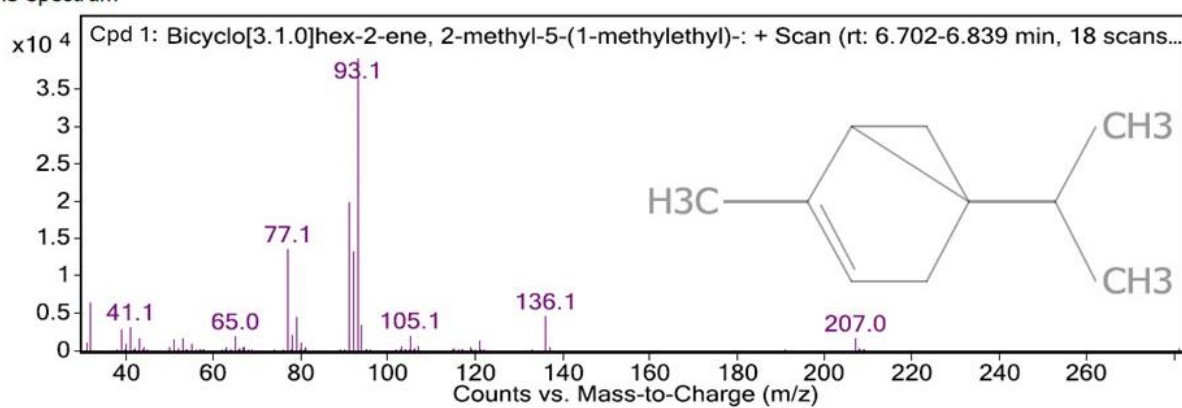

MS Spectrum

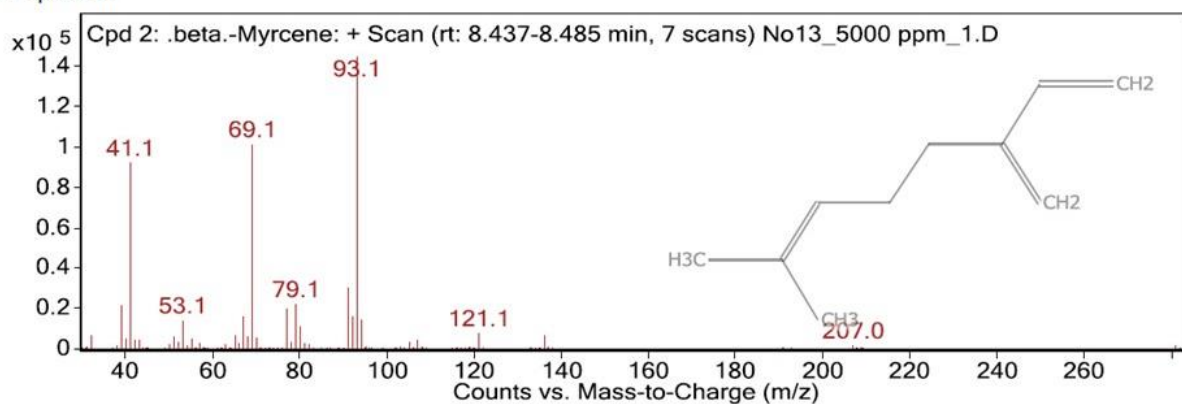

MS Spectrum

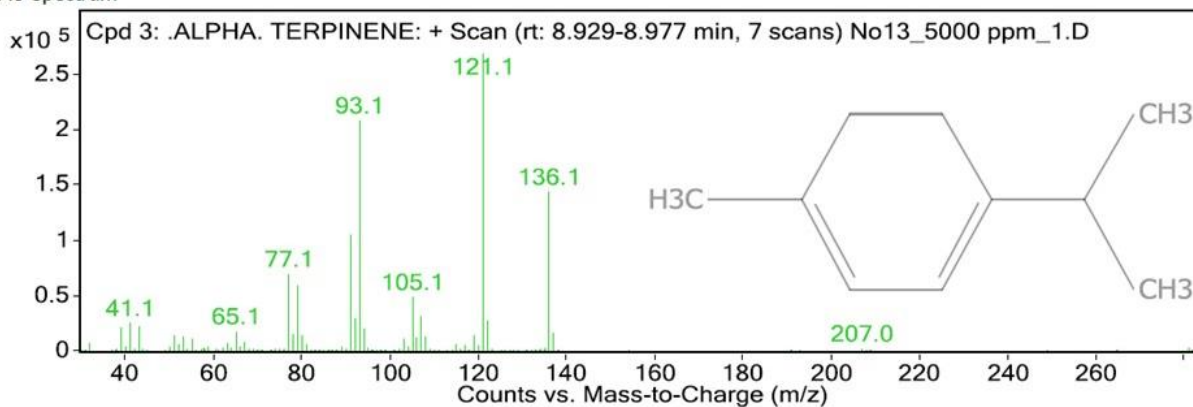

MS Spectrum

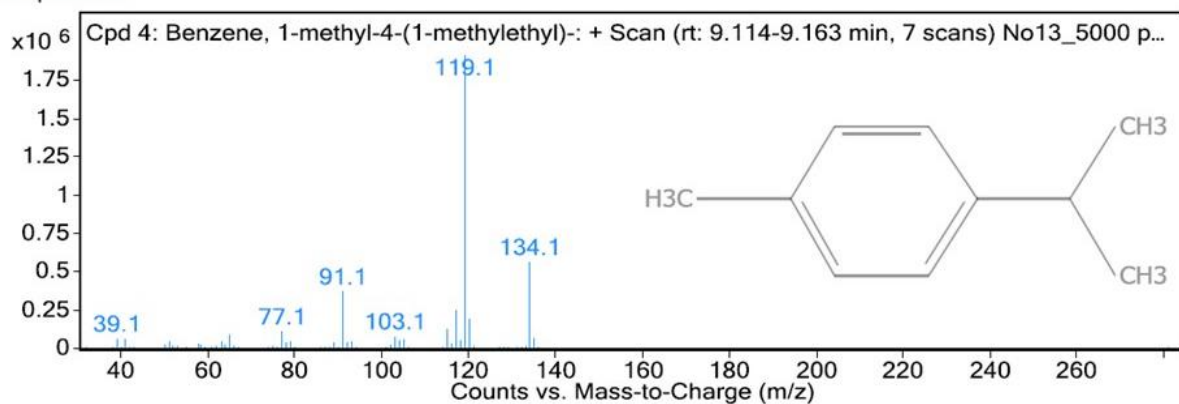

MS Spectrum

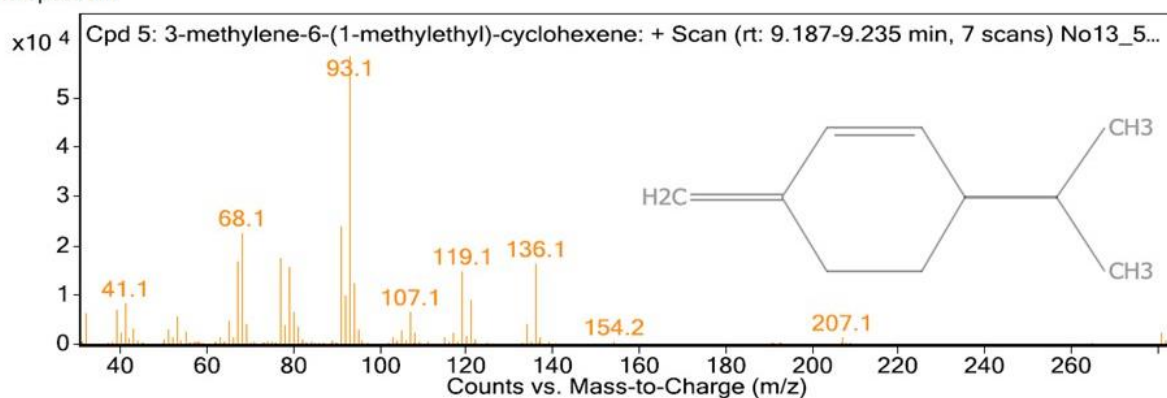

MS Spectrum

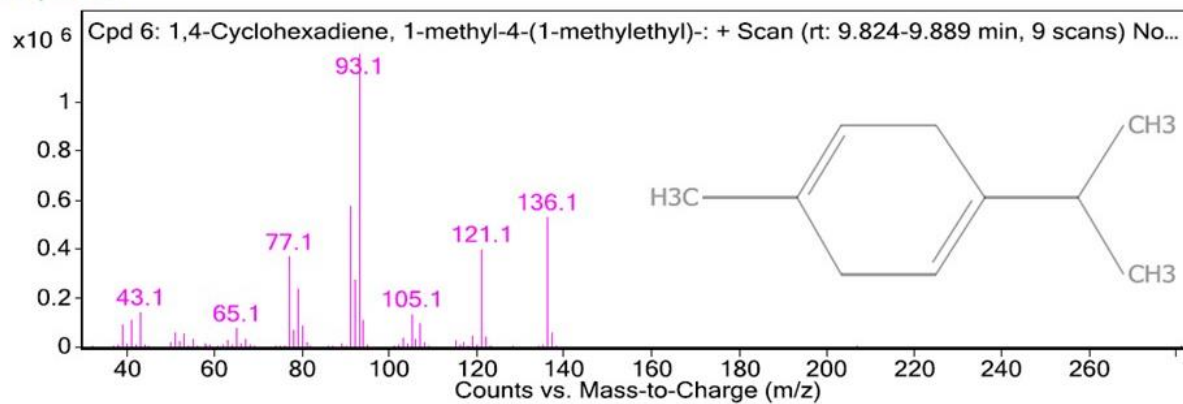

MS Spectrum

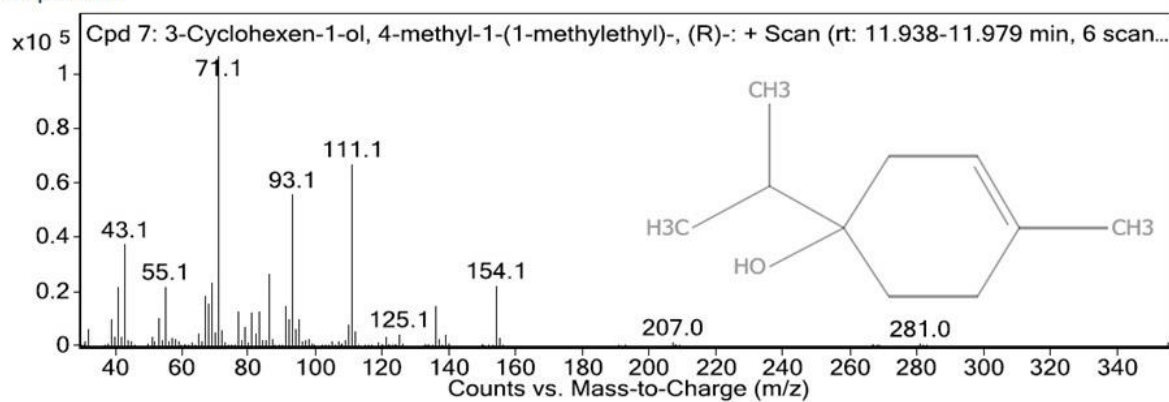

MS Spectrum

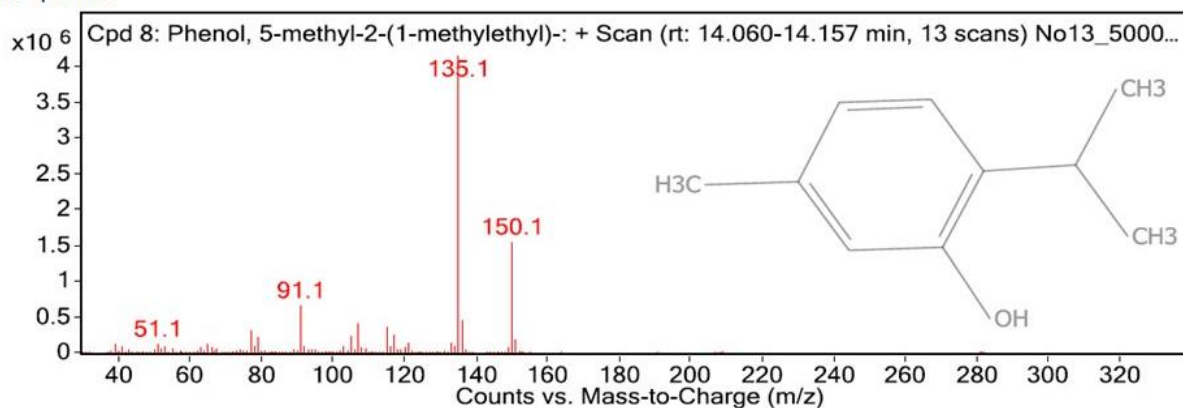

MS Spectrum

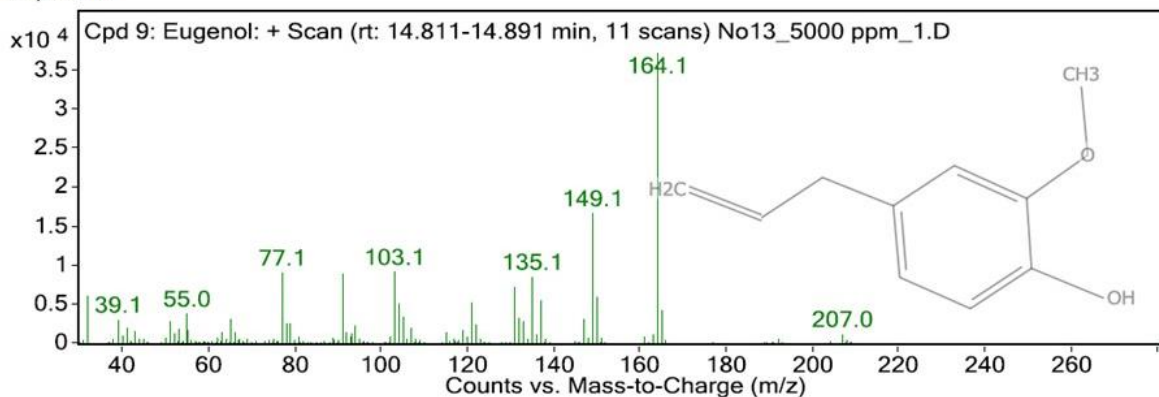

MS Spectrum

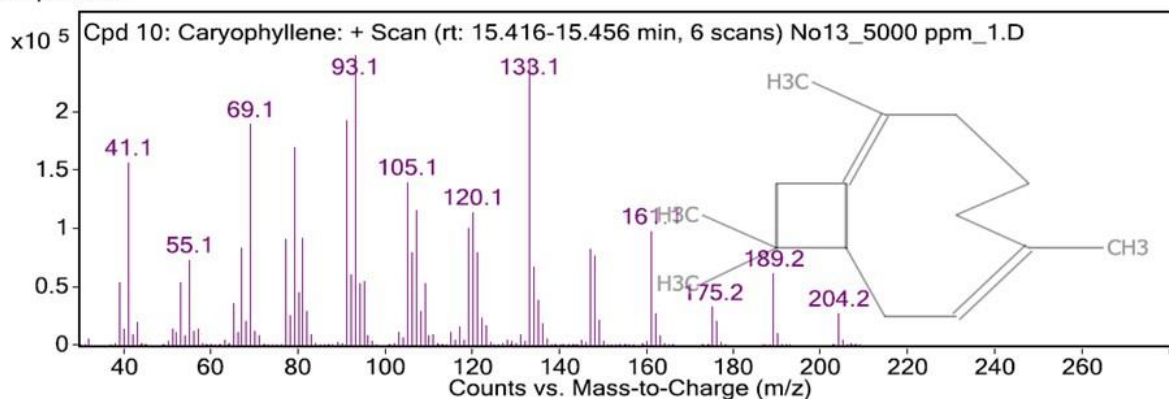

MS Spectrum

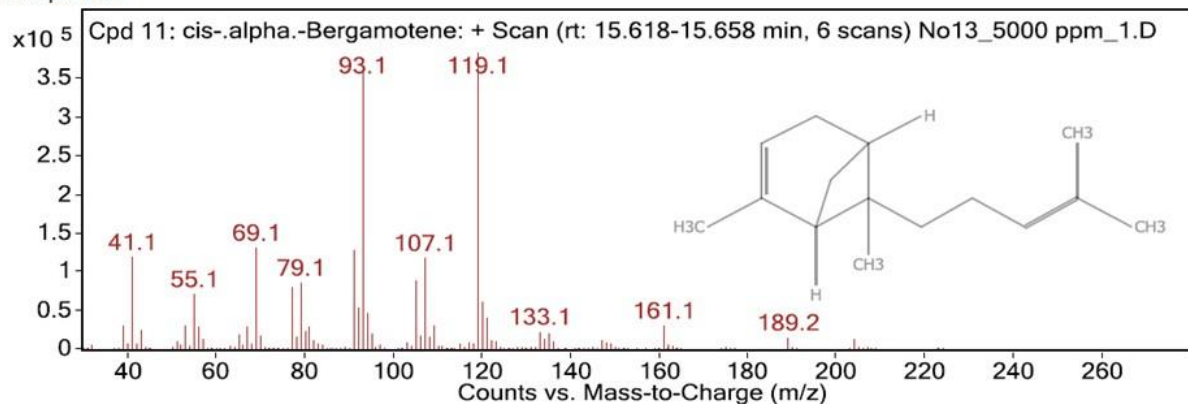

MS Spectrum

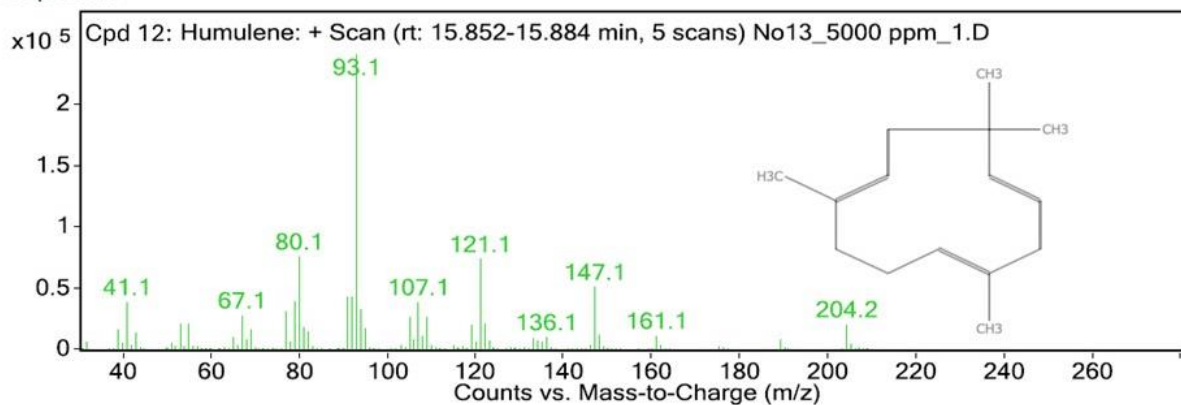

MS Spectrum

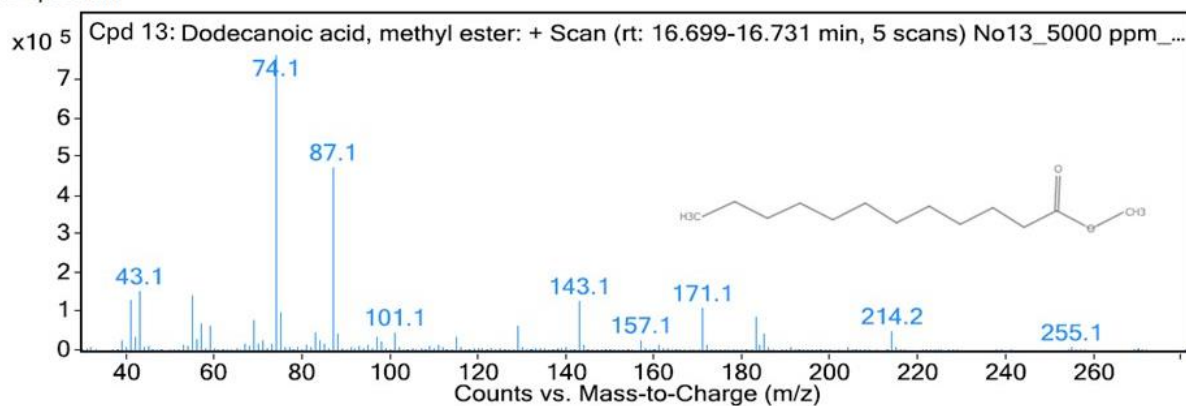

MS Spectrum

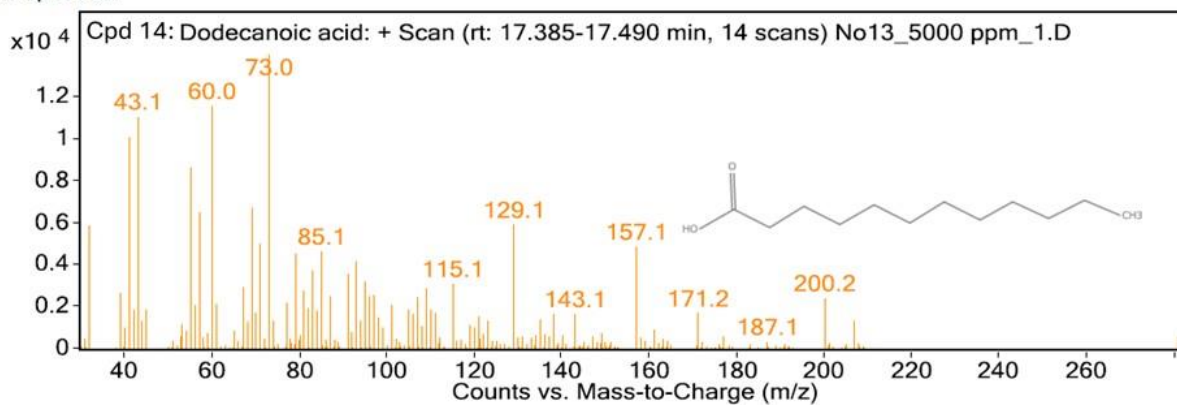

MS Spectrum

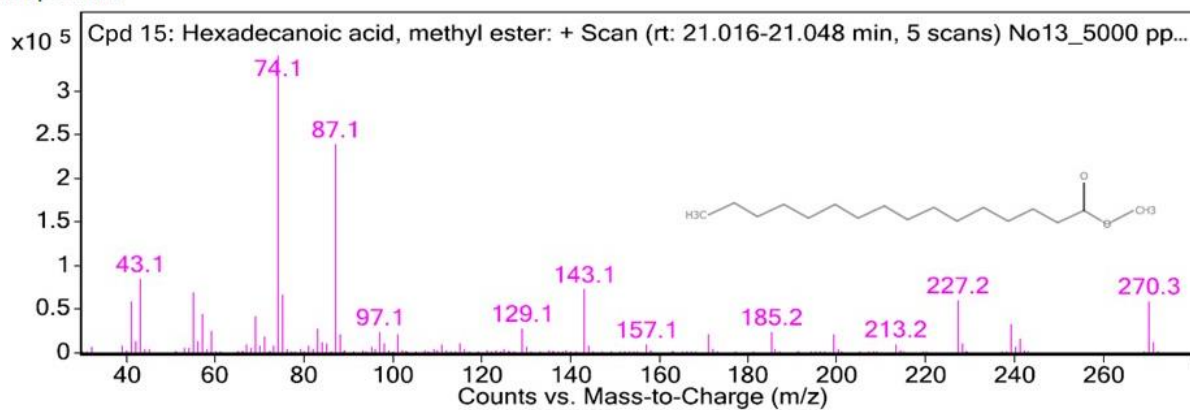

MS Spectrum

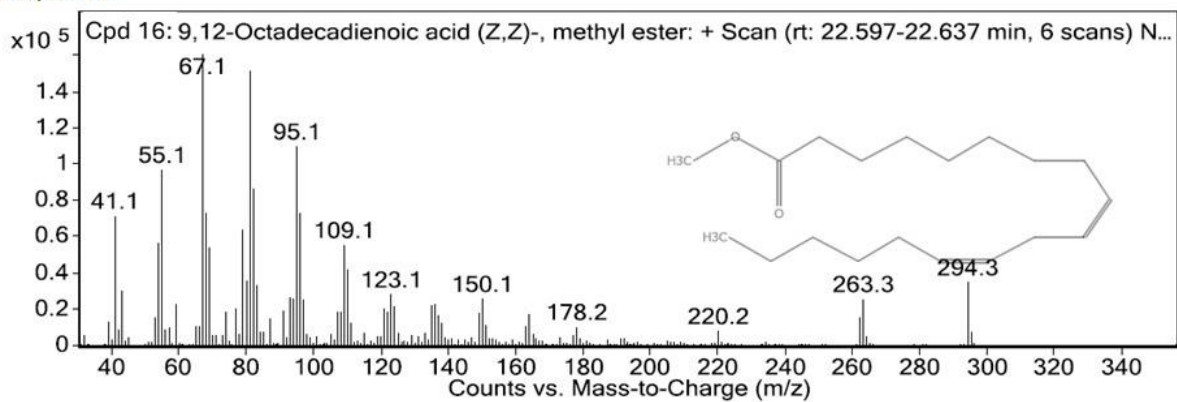

MS Spectrum

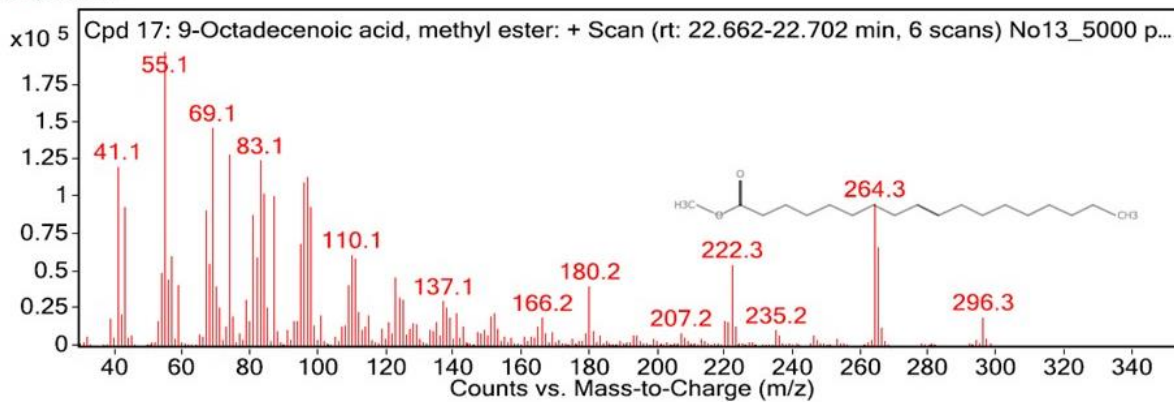

Supplement: s1 [file s1]
